# Supplementary material for: Highly enhanced dielectric strength and energy storage density in hydantoin@BaTiO3–P(VDF-HFP) composites with a sandwich-structure
Source: Royal Society of Chemistry journal article supplement (doi:10.1039/c5ra05748e), 2015-01-01
Supplement: c5ra05748e1.pdf [file c5ra05748e1.pdf]

## Electronic Supplementary Information

Highly enhanced dielectric strength and energy storage density  
in hydantoin@BaTiO<sub>3</sub>-P(VDF-HFP) composites by a  
sandwich-structure

Hang Luo,<sup>a</sup> Dou Zhang<sup>\*a</sup>, Lu Wang,<sup>a</sup> Chao Chen,<sup>\*a</sup> Jing Zhou<sup>b</sup> and Kechao Zhou<sup>a</sup>

<sup>a</sup> State Key Laboratory of Powder Metallurgy, Central South University, Changsha,  
Hunan 410083, China

<sup>b</sup> State Key Laboratory of Advanced Technology for Materials Synthesis and  
Processing, Wuhan University of Technology, Wuhan 430070, China

E-mail: [dzhang@csu.edu.cn](mailto:dzhang@csu.edu.cn) (D. Zhang) and [pkhqchenchao@126.com](mailto:pkhqchenchao@126.com) (C. Chen)

Table S1. Dielectric constants and breakdown strength of single layer of P(VDF-HFP) composites with different BT loadings.

| Composite  | $\epsilon @ 1 \text{ kHz}$ | $E_b$<br>( $\text{kV mm}^{-1}$ ) |
|------------|----------------------------|----------------------------------|
| P(VDF-HFP) | 6.92                       | 360                              |
| 10 vol% BT | 13.07                      | 330                              |
| 20 vol% BT | 20.24                      | 315                              |
| 30 vol% BT | 24.28                      | 240                              |
| 40 vol% BT | 31.96                      | 190                              |
| 50 vol% BT | 48.96                      | 187                              |

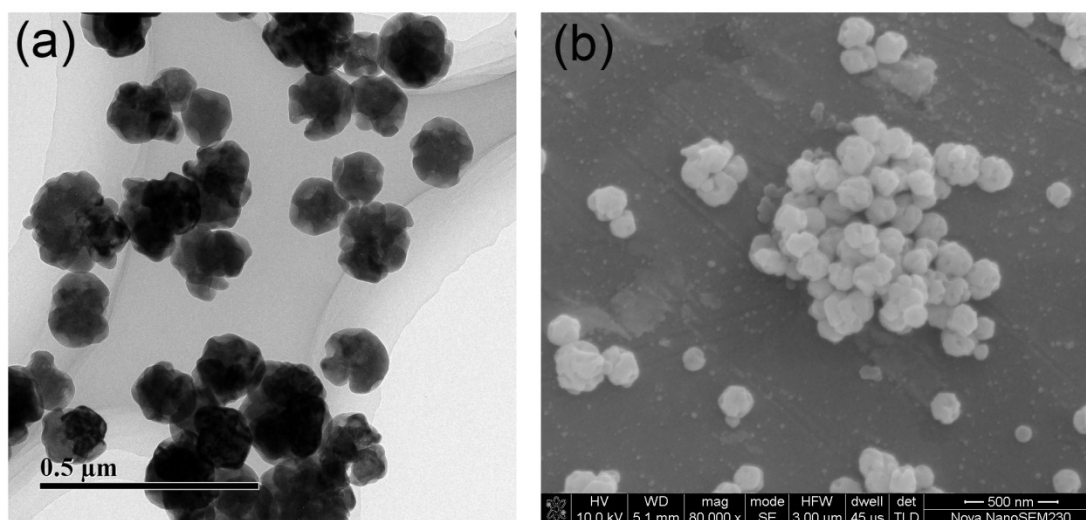

Fig. S1 (a) TEM image and (b) SEM image of pure BT. The sizes of the pure BT particles from TEM image and SEM image were almost similar with the hydantoin resin coated BT particles in Fig. 2.

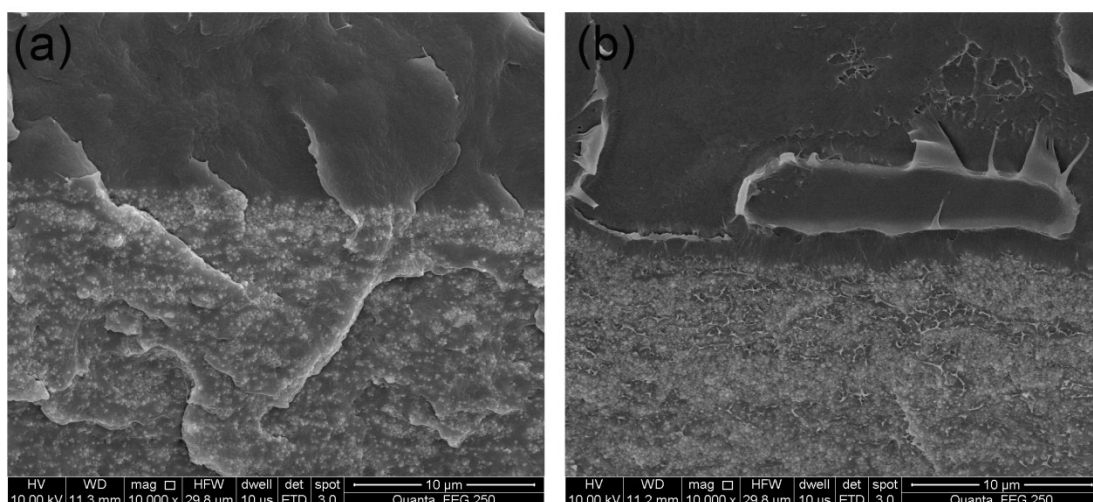

Fig. S2 High-magnification SEM images of sandwich-structured composites with (a) 20 vol% BT, (b) 40 vol% BT. The hydantoin resin coated BT particles exhibited homogeneous dispersing. Besides, the boundary lines between the central layers and neighboring layers were clearly observed.

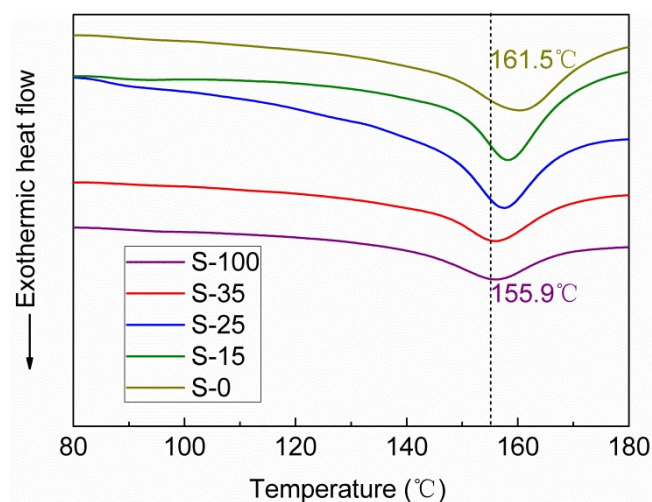

Fig. S3 DSC curves of the samples during the heating cycle at a rate of  $10\text{ }^{\circ}\text{C min}^{-1}$  under  $\text{N}_2$  atmosphere. The results illustrate that the BT particles in the composites increase the crystallization temperature by  $5.6\text{ }^{\circ}\text{C}$ , from  $155.9\text{ }^{\circ}\text{C}$  in the pure P(VDF-HFP) polymer (S-100) to  $161.5\text{ }^{\circ}\text{C}$  in the single layer sample (S-0), which shows

indeed the BT particles facilitate the crystallization process in the polymer matrix.

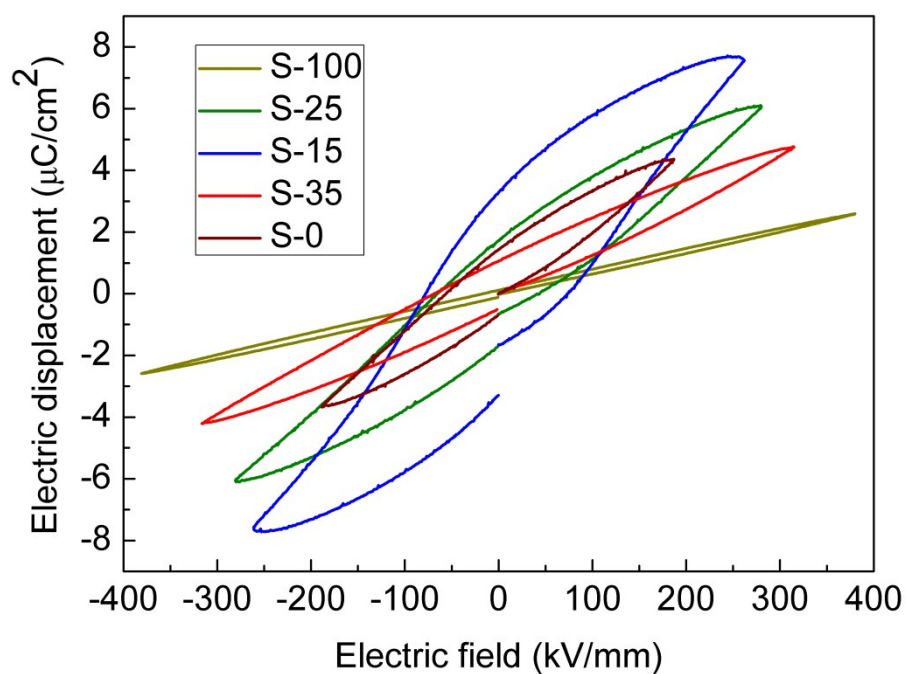

Fig. S4  $D-E$  loops of the samples at maximum electric field. As can be seen from Fig. S4, the electric displacement of the sandwich-structured composites increased notably compared with the single layer composites and pure P(VDF-HFP) polymer. Due to the introduced central layer largely enhanced the breakdown strength, the electric displacement of S-15 increased to  $7.68 \text{ uC cm}^{-2}$ , compared with the pure P(VDF-HFP) ( $4.36 \text{ uC cm}^{-2}$ ).
